# Supplementary material
Source: Springer Nature journal article supplement (https://www.springermedizin.de/resource/supplementary/12950_2010_168_MOESM13_ESM.pdf/9558110)

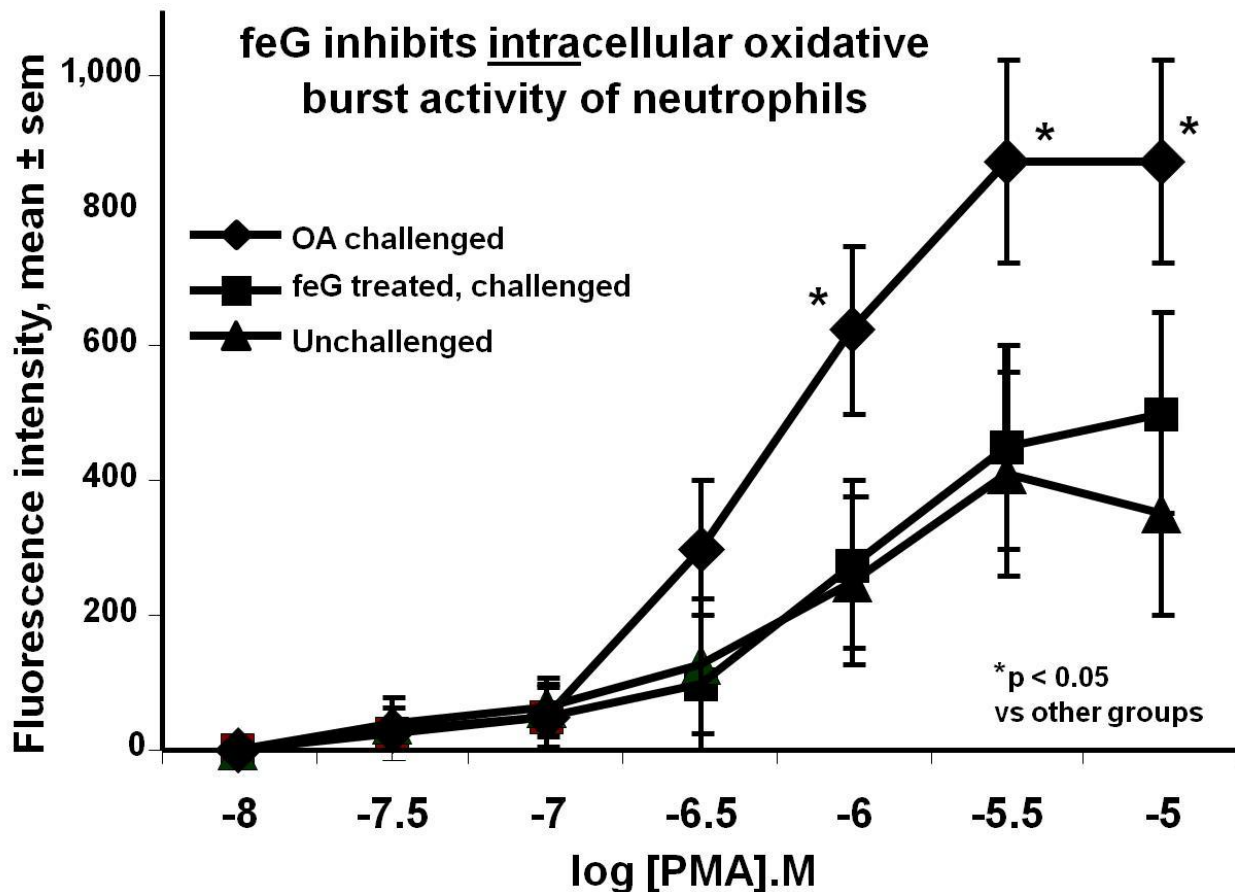

Supplement: MOESM13 [file 9558110]
